# Supplementary material
Source: Springer Nature journal article supplement (https://www.springerprofessional.de/resource/supplementary/13638_2011_21_MOESM10_ESM.pdf/11897282)
Supplement: MOESM10 [file 11897282]

---

*Algorithm 3: Whenever the sender receives add-dupacks*

---

1. *Retransmission Delay()* {
  2. *Receives add-dupaks*
  3. *Increment cwnd*
  4. *Send new packets*
  5. *If (add-dupacks  $\geq$  'delay-thresh'){*
  6.     *Retransmit the packet*
  7.     *cwnd = now*
  8. *}else {*
  9.     *Continue sending packets until cwnd > ssthresh*
  10. *}*
  11. *}*
-
